# Supplementary material for: Rationally rewiring the connectivity of the XylR/Pu regulatory node of the m-xylene degradation pathway in Pseudomonas putida
Source: Royal Society of Chemistry journal article supplement (doi:10.1039/c5ib00310e), 2016-01-01
Supplement: c5ib00310e1.pdf [file c5ib00310e1.pdf]

## Supplementary Methods

### Simplified model (toy model) of the *Pseudomonas putida* TOL network

The model used for simulations is adapted from our previously published model for this network (de Las Heras et al, 2015). Briefly, we assume that XylR, denoted by  $R_T$ , is synthesized at a constant background rate  $k'_{sR}$  and degraded also at a constant background rate,  $k_{dR}$ . XylR synthesis depends on its own activity, denoted as  $a_R$ . Therefore, we write a preliminary differential equation for XylR:

$$\frac{dR_T}{dt} = k'_{sR} + f(a_R) - k_{dR}R \quad 1$$

We assume that the inducer,  $I$ , activates XylR by forming a complex,  $R_c$ , whose concentration rapidly reaches equilibrium and is described by

$$R_c = R_T \frac{I}{K_D + I} \quad 2$$

where  $K_D$  is the dissociation constant of the XylR-inducer complex. Also, the sum of the complex and the free forms is equal to the total amount of XylR:

$$R_T = R_c + R_f \quad 3$$

We assume that the DNA binding activity of XylR depends on the concentration of the complex and free forms according to

$$a_R = \lambda R_c + \alpha R_f \quad 4$$

Where normally  $\lambda > \alpha$ , and  $\lambda$  is a parameter that indicates how strongly a particular inducer activates XylR, and  $\alpha$  indicates the background activity of free XylR. Combining equations 2, 3 and 4 we obtain an expression to describe the level of activity of XylR:

$$a_R = R_T \left( \alpha + (\lambda - \alpha) \frac{I}{K_D + I} \right) \quad 5$$

With this equation, we can define the function  $f(a_R)$  from equation 1. For the model of the wild type network, where XylR inhibits its own transcription in a negative feedback loop, the function  $f_n$  from equation 1 is defined as:

$$f_n(a_R) = k''_{sR} \frac{J_R^{n_R}}{J_R^{n_R} + a_R^{n_R}} \quad 6$$

Where  $k''_{sR}$  is the maximum rate of XylR synthesis (when  $a_R = 0$ ),  $J_R$  is the  $a_R$  level resulting in half-maximal XylR-dependent transcriptional inhibition and  $n_R$  is the Hill coefficient which determines how steep is the transcriptional inhibition.

For the network with a positive feedback loop, the  $f(a_R)$  function describing transcriptional activation of XylR by itself is:

$$f_p(a_R) = k''_{SR}\sigma \frac{a_R^{nR}}{J_R^{nR} + a_R^{nR}} \quad 7$$

Where  $k''_{SR}\sigma$  is the maximum rate of XylR synthesis;  $k''_{SR}$  represents the contribution to the rate made by active XylR and  $\sigma$  takes into account the amount of the  $\sigma^{54}$  factor present in the cell.  $J_R$  is the  $a_R$  level resulting in half-maximal XylR-dependent transcriptional activation and  $n_R$  is the Hill coefficient which determines the steepness of the activation.

For the model in which  $\sigma^{54}$  is controlled by Pu,  $\sigma$  is no longer a parameter, but is itself described by a differential equation:

$$\frac{d\sigma}{dt} = k'_{s\sigma} + k''_{s\sigma}\sigma \frac{a_R^{n\sigma}}{J_\sigma^{n\sigma} + a_R^{n\sigma}} + k_{d\sigma}\sigma \quad 8$$

Here,  $k'_{s\sigma}$  is the background rate of synthesis,  $k''_{s\sigma}$  the maximum maximal rate of XylR and  $\sigma^{54}$ -dependent  $\sigma^{54}$  synthesis.  $J_\sigma$  is the  $a_R$  level resulting in half-maximal XylR-dependent transcriptional activation of  $\sigma^{54}$  and  $n_\sigma$  is the Hill coefficient of XylR transcriptional activation.

Finally, we write a differential equation for the concentration of the Lux reporter, whose synthesis is also activated by XylR.

$$\frac{dL}{dt} = k'_{sL} + k''_{sL}\sigma \frac{a_R^{nL}}{J_L^{nL} + a_R^{nL}} + k_{dL} \quad 9$$

Where  $k'_{sL}$  is a small background synthesis rate  $k''_{sL}\sigma$  is the maximum rate of XylR and  $\sigma^{54}$ -dependent Lux synthesis.  $J_L$  is the  $a_R$  level resulting in half-maximal XylR-dependent transcriptional activation of *lux* and  $n_L$  is the Hill coefficient which determines the steepness of XylR transcriptional activation.

We used MATLAB to simulate these systems of ODEs. Parameters are shown in Supplementary table 1. Rate constants (k) have a dimension of  $\text{time}^{-1}$ , while all the other parameters are dimensionless. For rate constants, values were empirically chosen to reflect credible relative relationships and dynamics.

**Table 1.** Parameter values for the mathematical model of the TOL network

| Parameter  | Value                                           |
|------------|-------------------------------------------------|
| $k'_{sR}$  | 0                                               |
| $k_{dR}$   | 1                                               |
| $K_D$      | 1                                               |
| $\lambda$  | 1 (optimal inducer), 0.45 (sub-optimal inducer) |
| $\alpha$   | 0.01                                            |
| $k''_{sR}$ | 1                                               |
| $J_R$      | 0.2                                             |
| $nR$       | 3                                               |
| $k'_{sL}$  | 0.5                                             |
| $k''_{sL}$ | 1                                               |

|                 |                                                           |
|-----------------|-----------------------------------------------------------|
| $k_{dL}$        | 0.5                                                       |
| $J_L$           | 0.2                                                       |
| $nL$            | 3                                                         |
| $k'_{s\sigma}$  | 0.5                                                       |
| $k''_{s\sigma}$ | 1                                                         |
| $k_{d\sigma}$   | 0.5                                                       |
| $J_\sigma$      | 0.2                                                       |
| $n\sigma$       | 3                                                         |
| $\sigma$        | 1 for wild-type $\sigma^{54}$ , 2 for PsaI- $\sigma^{54}$ |
| $l$             | 0 (before induction), 20 (after induction)                |
